# Supplementary material for: Toward a better understanding of the mechanisms of symbiosis: a comprehensive proteome map of a nascent insect symbiont
Source: PeerJ. 2017 May 9;5:e3291. doi: 10.7717/peerj.3291 (PMC5426354; doi:10.7717/peerj.3291)
Supplement: Table S1 [file peerj-05-3291-s001.xlsx]

## Sheet: All identified proteins
Table S1. List of all identified proteins of S. symbiotica CWBI-2.3T. Proteins were assigned to functional categories based on clusters of COG and their localization was predicted with PSORTb version 3.0.2.
N	Accession #	Name	Function	Predicted localization
1	CDS55519.1	chaperone Hsp70, co-chaperone with DnaJ	Function unknown	Cytoplasmic
2	CDS56087.1	protein chain elongation factor EF-Tu, possible GTP-binding factor (duplicate of tufA)	Carbohydrate transport and metabolism	Cytoplasmic
3	CDS56911.1	RNA polymerase, beta prime subunit	Cell wall/membrane/envelope biogenesis	Cytoplasmic
4	CDS58787.1	outer membrane protein assembly factor	Transcription	Outer membrane
5	CDS56961.1	chaperone Hsp60, peptide-dependent ATPase, heat shock protein	Function unknown	Cytoplasmic
6	CDS56910.1	RNA polymerase, beta subunit	Cell wall/membrane/envelope biogenesis	Cytoplasmic
7	CDS57708.1	30S ribosomal subunit protein S1	Cell cycle control, cell division, chromosome partitioning	Cytoplasmic
8	CDS58965.1	Chaperone protein HtpG (molecular chaperone HSP90 family)	Function unknown	Cytoplasmic
9	CDS56377.1	F1 sector of membrane-bound ATP synthase, beta subunit	Posttranslational modification, protein turnover, chaperones	Cytoplasmic
10	CDS56189.1	Virulence protein SrfB	Posttranslational modification, protein turnover, chaperones	Inner membrane
11	CDS56088.1	protein chain elongation factor EF-G,GTP-binding	Carbohydrate transport and metabolism	Cytoplasmic
12	CDS56306.1	GTP-binding elongation factor family protein	Cell cycle control, cell division, chromosome partitioning	Inner membrane
13	CDS59016.1	protein disaggregation chaperone	Function unknown	Cytoplasmic
14	CDS56379.1	F1 sector of membrane-bound ATP synthase, alpha subunit	Posttranslational modification, protein turnover, chaperones	Cytoplasmic
15	CDS56781.1	protease, ATP-dependent zinc-metallo	Function unknown	Inner membrane
16	CDS58119.1	fused ribonucleaseE: endoribonuclease ; RNA-binding protein ;RNA degradosome binding protein	Carbohydrate transport and metabolism	Cytoplasmic
17	CDS57861.1	outer membrane protein A (3a;II*;G;d)	Transcription	Outer membrane
18	CDS55578.1	preprotein translocase subunit, ATPase	Inorganic ion transport and metabolism	Cytoplasmic
19	CDS56767.1	ATP-dependent RNA helicase	Energy production and conversion	Cytoplasmic
20	CDS58878.1	DNA-binding ATP-dependent protease La	Function unknown	Cytoplasmic
21	CDS56420.1	Non-ribosomal peptide synthetase modules (fragment)	Posttranslational modification, protein turnover, chaperones	Cytoplasmic
22	CDS58232.1	fused UDP-L-Ara4N formyltransferase ; UDP-GlcA C-4'-decarboxylase	Translation, ribosomal struture and biogenesis	Cytoplasmic
23	CDS55885.1	pyruvate dehydrogenase, decarboxylase component E1, thiamin-binding	Posttranslational modification, protein turnover, chaperones	Cytoplasmic
24	CDS57479.1	outer membrane pore protein N, non-specific	Transcription	Outer membrane
25	CDS57991.1	ribonucleoside diphosphate reductase 1, alpha subunit	Energy production and conversion	Cytoplasmic
26	CDS56982.1	modulator for HflB protease specific for phage lambda cII repressor	Function unknown	Unknown
27	CDS58907.1	SecYEG protein translocase auxillary subunit	Inorganic ion transport and metabolism	Inner membrane
28	CDS55494.1	fused putative transporter subunits of ABC superfamily: ATP-binding components	Posttranslational modification, protein turnover, chaperones	Cytoplasmic
29	CDS58876.1	peptidyl-prolyl cis-trans isomerase (rotamase D)	Function unknown	Inner membrane
30	CDS58881.1	peptidyl-prolyl cis/trans isomerase (trigger factor)	Function unknown	Cytoplasmic
31	CDS57370.1	malate dehydrogenase, FAD/NAD(P)-binding domain	Cell wall/membrane/envelope biogenesis	Probable multiple localization sites
32	CDS56770.1	Polyribonucleotide nucleotidyltransferase (polynucleotide phosphorylase/polyadenylase)	Carbohydrate transport and metabolism	Cytoplasmic
33	CDS58228.1	phenylalanine tRNA synthetase, beta subunit	Carbohydrate transport and metabolism	Cytoplasmic
34	CDS56774.1	translation initiation factor IF-2	Carbohydrate transport and metabolism	Cytoplasmic
35	CDS55609.1	ferric citrate outer membrane transporter; KpLE2 phage-like element	Intracellular trafficking, secretion, and vesicular transport	Outer membrane
36	CDS55717.1	D-alanyl-D-alanine carboxypeptidase (penicillin-binding protein 5)	Transcription	Inner membrane
37	CDS56082.1	50S ribosomal subunit protein L2	Carbohydrate transport and metabolism	Cytoplasmic
38	CDS58309.1	TonB-dependent copper receptor	Intracellular trafficking, secretion, and vesicular transport	Outer membrane
39	CDS59035.1	alanyl-tRNA synthetase	Carbohydrate transport and metabolism	Cytoplasmic
40	CDS56079.1	30S ribosomal subunit protein S3	Carbohydrate transport and metabolism	Cytoplasmic
41	CDS56061.1	RNA polymerase, alpha subunit	cell cycle control, cell division, chromosome partitioning	Cytoplasmic
42	CDS58795.1	30S ribosomal subunit protein S2	Carbohydrate transport and metabolism	Cytoplasmic
43	CDS58428.1	UDP-glucose 6-dehydrogenase	Transcription	Cytoplasmic
44	CDS57953.1	phosphate acetyltransferase	Translation, ribosomal structure and biogenesis	Cytoplasmic
45	CDS58879.1	ATP-dependent Clp protease ATP-binding subunit	Function unknown	Cytoplasmic
46	CDS55619.1	peptidyl-prolyl cis-trans isomerase (PPIase)	Function unknown	Periplasmic
47	CDS57402.1	gluconate-6-phosphate dehydrogenase,decarboxylating	Translation, ribosomal structure and biogenesis	Cytoplasmic
48	CDS55974.1	transport channel	Replication, recombination and repair	Outer membrane
49	CDS56464.1	DNA gyrase, subunit B (type II topoisomerase)	Energy production and conversion	Cytoplasmic
50	CDS58194.1	isocitrate dehydrogenase	Cell wall/membrane/envelope biogenesis	Cytoplasmic
51	CDS56062.1	30S ribosomal subunit protein S4	Amino acid transport and metabolism	Cytoplasmic
52	CDS56089.1	30S ribosomal subunit protein S7	Amino acid transport and metabolism	Cytoplasmic
53	CDS56990.1	30S ribosomal subunit protein S6	Amino acid transport and metabolism	Cytoplasmic
54	CDS56362.1	rod shape-determining protein	Transcription	Cytoplasmic
55	CDS55520.1	Chaperone protein DnaJ (chaperone Hsp40,co-chaperone with DnaK)	Function unknown	Cytoplasmic
56	CDS56073.1	50S ribosomal subunit protein L5	Amino acid transport and metabolism	Cytoplasmic
57	CDS58794.1	protein chain elongation factor EF-Ts	Amino acid transport and metabolism	Cytoplasmic
58	CDS57473.1	fused chromosome partitioning protein: putative nucleotide hydrolase ; conserved hypothetical protein ; conserved protein	Translation, ribosomal structure and biogenesis	Cytoplasmic
59	CDS56159.1	transcriptional accessory protein	Cell cycle control, cell division, chromosome partitioning	Cytoplasmic
60	CDS56374.1	L-glutamine:D-fructose-6-phosphate aminotransferase	Translation, ribosomal structure and biogenesis	Cytoplasmic
61	CDS58149.1	putative reductase Spro_1949	Lipid transport and metabolism	Cytoplasmic
62	CDS58648.1	protein assembly complex, lipoprotein component	Transcription	Probable multiple localization sites
63	CDS57228.1	peptidoglycan-associated outer membrane lipoprotein	Transcription	Outer membrane
64	CDS56501.1	glycine tRNA synthetase, beta subunit	Amino acid transport and metabolism	Cytoplasmic
65	CDS56070.1	50S ribosomal subunit protein L6	Amino acid transport and metabolism	Cytoplasmic
66	CDS57488.1	fused ATP-binding subunits of ABC superfamily protein involved in precise excision of transposons	Function unknown	Cytoplasmic
67	CDS56190.1	putative virulence factor	Posttranslational modification, protein turnover, chaperones	Inner membrane
68	CDS56068.1	30S ribosomal subunit protein S5	Amino acid transport and metabolism	Cytoplasmic
69	CDS57227.1	periplasmic protein	Function unknown	Periplasmic
70	CDS58383.1	ribonuclease II	Cell wall/membrane/envelope biogenesis	Cytoplasmic
71	CDS58778.1	acetyl-CoA carboxylase, carboxytransferase, alpha subunit	General function prediction only	Cytoplasmic
72	CDS56085.1	50S ribosomal subunit protein L3	Amino acid transport and metabolism	Cytoplasmic
73	CDS56095.1	FKBP-type peptidyl-prolyl cis-trans isomerase (rotamase)	Function unknown	Periplasmic
74	CDS55883.1	lipoamide dehydrogenase, E3 component is part of three enzyme complexes	Posttranslational modification, protein turnover, chaperones	Cytoplasmic
75	CDS58725.1	leader peptidase (signal peptidase I)	Inorganic ion transport and metabolism	Inner membrane
76	CDS56316.1	fused DNA polymerase I 5'-_3' exonuclease ; 3'-_5' polymerase ; 3'-_5' exonuclease	Defense mechanisms	Cytoplasmic
77	CDS58438.1	protease IV (signal peptide peptidase)	Translation, ribosomal struture and biogenesis	Inner membrane
78	CDS58231.1	undecaprenyl phosphate-L-Ara4FN transferase	General function prediction only	Inner membrane
79	CDS58954.1	putative protease, membrane anchored	Posttranslational modification, protein turnover, chaperones	Cytoplasmic
80	CDS56738.1	transcription termination factor	Cell wall/membrane/envelope biogenesis	Cytoplasmic
81	CDS55928.1	serine endoprotease, periplasmic	Function unknown	Periplasmic
82	CDS57224.1	membrane spanning protein in TolA-TolQ-TolR complex	Replication, recombination and repair	Inner membrane
83	CDS59019.1	Outer membrane protein assembly factor BamD	Transcription	Outer membrane
84	CDS56525.1	glycerol-3-phosphate O-acyltransferase	General function prediction only	Inner membrane
85	CDS55510.1	DNA-binding response regulator in two-component regulatory system with ArcB or CpxA	Cell cycle control, cell division, chromosome partitioning	Cytoplasmic
86	CDS57427.1	lipoprotein	Transcription	Outer membrane
87	CDS55618.1	exported protein required for envelope biosynthesis and integrity	Transcription	Outer membrane
88	CDS56908.1	50S ribosomal subunit protein L10	Amino acid transport and metabolism	Cytoplasmic
89	CDS55574.1	GTP-binding tubulin-like cell division protein (Cell division protein FtsZ)	Translation, ribosomal structure and biogenesis	Cytoplasmic
90	CDS57386.1	methionyl-tRNA synthetase	Amino acid transport and metabolism	Cytoplasmic
91	CDS58760.1	putative methyltransferase	Lipid transport and metabolism	Cytoplasmic
92	CDS58188.1	DNA-binding response regulator in two-component regulatory system with PhoQ	Cell wall/membrane/envelope biogenesis	Cytoplasmic
93	CDS59037.1	DNA strand exchange and recombination protein with protease and nuclease activity	Defense mechanisms	Cytoplasmic
94	CDS57670.1	fused macrolide transporter subunits of ABC superfamily: ATP-binding component ; membrane component	Replication, recombination and repair	Inner membrane
95	CDS56084.1	50S ribosomal subunit protein L4	Amino acid transport and metabolism	Cytoplasmic
96	CDS58771.1	prolyl-tRNA synthetase	Amino acid transport and metabolism	Cytoplasmic
97	CDS57669.1	macrolide transporter subunit, membrane fusion protein (MFP) component	Replication, recombination and repair	Inner membrane
98	CDS56188.1	putative virulence effector protein	Posttranslational modification, protein turnover, chaperones	Unknown
99	CDS55804.1	exonuclease, dsDNA, ATP-dependent	Defense mechanisms	Cytoplasmic
100	CDS58442.1	glyceraldehyde-3-phosphate dehydrogenase A	Translation, ribosomal structure and biogenesis	Cytoplasmic
101	CDS58973.1	multidrug efflux system	Replication, recombination and repair	Inner membrane
102	CDS56650.1	uroporphyrin-III C-methyltransferase	RNA processing and modification	Inner membrane
103	CDS59012.1	transketolase 1, thiamin-binding	Translation, ribosomal structure and biogenesis	Cytoplasmic
104	CDS56983.1	modulator for HflB protease specific for phage lambda cII repressor	Function unknown	Cytoplasmic
105	CDS56932.1	conserved hypothetical protein	Posttranslational modification, protein turnover, chaperones	Unknown
106	CDS55846.1	methionine adenosyltransferase 1	RNA processing and modification	Cytoplasmic
107	CDS58227.1	phenylalanine tRNA synthetase, alpha subunit	Amino acid transport and metabolism	Cytoplasmic
108	CDS56275.1	valyl-tRNA synthetase	Amino acid transport and metabolism	Cytoplasmic
109	CDS57593.1	E3 ubiquitin-protein ligase ipaH9.8 (modular protein)	Energy production and conversion	Extracellular
110	CDS58130.1	3-oxoacyl-(acyl-carrier-protein) synthase II	General function prediction only	Cytoplasmic
111	CDS57487.1	putative conserved AdoMet-dependent methyltransferase with RNA interaction domain	Amino acid transport and metabolism	Cytoplasmic
112	CDS55884.1	pyruvate dehydrogenase,dihydrolipoyltransacetylase component E2	Posttranslational modification, protein turnover, chaperones	Cytoplasmic
113	CDS55923.1	30S ribosomal subunit protein S9	Amino acid transport and metabolism	Cytoplasmic
114	CDS56907.1	50S ribosomal subunit protein L1	Amino acid transport and metabolism	Cytoplasmic
115	CDS55594.1	serine endoprotease (protease Do),membrane-associated	Energy production and conversion	Periplasmic
116	CDS57477.1	aspartate aminotransferase, PLP-dependent	Translation, ribosomal struture and biogenesis	Cytoplasmic
117	CDS56992.1	50S ribosomal subunit protein L9	Amino acid transport and metabolism	Cytoplasmic
118	CDS58886.1	cytochrome o ubiquinol oxidase subunit II	Posttranslational modification, protein turnover, chaperones	Inner membrane
119	CDS58726.1	GTP-binding membrane protein	Amino acid transport and metabolism	Inner membrane
120	CDS58199.1	nucleoside channel, receptor of phage T6 and colicin K	Cell wall/membrane/envelope biogenesis	Outer membrane
121	CDS58669.1	serine hydroxymethyltransferase	Translation, ribosomal struture and biogenesis	Cytoplasmic
122	CDS56346.1	molecular chaperone and ATPase component of HslUV protease	Energy production and conversion	Cytoplasmic
123	CDS57371.1	putative transporter fused subunits of ABC superfamily: ATP-binding components	Lipid transport and metabolism	Cytoplasmic
124	CDS55924.1	50S ribosomal subunit protein L13	Amino acid transport and metabolism	Cytoplasmic
125	CDS58230.1	uridine 5'-(beta-1-threo-pentapyranosyl-4-ulose diphosphate) aminotransferase, PLP-dependent	Cell wall/membrane/envelope biogenesis	Cytoplasmic
126	CDS58984.1	lysine tRNA synthetase, constitutive	Amino acid transport and metabolism	Cytoplasmic
127	CDS56307.1	glutamine synthetase	Translation, ribosomal structure and biogenesis	Cytoplasmic
128	CDS56086.1	30S ribosomal subunit protein S10	Amino acid transport and metabolism	Cytoplasmic
129	CDS59018.1	23S rRNA pseudouridine synthase	Amino acid transport and metabolism	Cytoplasmic
130	CDS56142.1	fused penicillin-binding protein 1a: murein transglycosylase ; murein transpeptidase	Transcription	Inner membrane
131	CDS58948.1	peptidyl-prolyl cis-trans isomerase B (rotamase B)	Energy production and conversion	Cytoplasmic
132	CDS55615.1	RNA polymerase-associated helicase protein (ATPase and RNA polymerase recycling factor)	Cell wall/membrane/envelope biogenesis	Probable multiple localization sites
133	CDS56786.1	GTPase involved in cell partioning and DNA repair	Translation, ribosomal structure and biogenesis	Cytoplasmic
134	CDS57462.1	glutamyl-tRNA synthetase	Amino acid transport and metabolism	Cytoplasmic
135	CDS58165.1	Ribose-phosphate pyrophosphokinase (phosphoribosylpyrophosphate synthase)	Function unknown	Cytoplasmic
136	CDS55589.1	glutamate-1-semialdehyde aminotransferase (aminomutase)	Replication, recombination and repair	Cytoplasmic
137	CDS57993.1	DNA gyrase (type II topoisomerase), subunit A	Defense mechanisms	Cytoplasmic
138	CDS56212.1	oligopeptidase A	Translation, ribosomal structure and biogenesis	Cytoplasmic
139	CDS58488.1	aspartyl-tRNA synthetase	Amino acid transport and metabolism	Cytoplasmic
140	CDS57343.1	conserved exported hypothetical protein	Posttranslational modification, protein turnover, chaperones	Inner membrane
141	CDS58221.1	conserved membrane hypothetical protein	Posttranslational modification, protein turnover, chaperones	Unknown
142	CDS58663.1	cysteine desulfurase (tRNA sulfurtransferase),PLP-dependent	Translation, ribosomal structure and biogenesis	Cytoplasmic
143	CDS58351.1	DNA-binding transcriptional dual regulator,tyrosine-binding	Translation, ribosomal structure and biogenesis	Cytoplasmic
144	CDS56066.1	50S ribosomal subunit protein L15	Amino acid transport and metabolism	Cytoplasmic
145	CDS57234.1	phosphoglyceromutase 1	Cell wall/membrane/envelope biogenesis	Cytoplasmic
146	CDS58641.1	GMP synthetase (glutamine aminotransferase)	Function unknown	Cytoplasmic
147	CDS55470.1	TonB-dependent copper receptor	Intracellular trafficking, secretion, and vesicular transport	Outer membrane
148	CDS55922.1	stringent starvation protein A	Lipid transport and metabolism	Cytoplasmic
149	CDS57957.1	glutamate-pyruvate aminotransferase	Translation, ribosomal structure and biogenesis	Cytoplasmic
150	CDS58649.1	conserved hypothetical protein	Posttranslational modification, protein turnover, chaperones	Extracellular
151	CDS57219.1	cytochrome d terminal oxidase, polypeptide subunit I	Posttranslational modification, protein turnover, chaperones	Inner membrane
152	CDS59009.1	fructose-bisphosphate aldolase, class II	Translation, ribosomal structure and biogenesis	Cytoplasmic
153	CDS57747.1	50S ribosomal subunit protein L25	Amino acid transport and metabolism	Cytoplasmic
154	CDS56381.1	F0 sector of membrane-bound ATP synthase, subunit b	Intracellular trafficking, secretion, and vesicular transport	Inner membrane
155	CDS57420.1	putative cell envelope integrity inner membrane protein TolA	Transcription	Unknown
156	CDS56090.1	30S ribosomal subunit protein S12	Amino acid transport and metabolism	Cytoplasmic
157	CDS58895.1	sulfurtransferase required for thiamine and 4-thiouridine biosynthesis	Replication, recombination and repair	Cytoplasmic
158	CDS58735.1	heat shock protein	Energy production and conversion	Cytoplasmic
159	CDS58974.1	multidrug efflux system protein	Replication, recombination and repair	Inner membrane
160	CDS55570.1	UDP-N-acetylmuramate:L-alanine ligase	Translation, ribosomal structure and biogenesis	Cytoplasmic
161	CDS56380.1	F1 sector of membrane-bound ATP synthase, delta subunit	Posttranslational modification, protein turnover, chaperones	Cytoplasmic
162	CDS58510.1	Similar to Syringopeptin synthetase C (fragment)	Translation, ribosomal struture and biogenesis	Probable multiple localization sites
163	CDS56334.1	phosphoenolpyruvate carboxylase	Translation, ribosomal structure and biogenesis	Cytoplasmic
164	CDS57962.1	NADH dehydrogenase I chain C,D	Posttranslational modification, protein turnover, chaperones	Cytoplasmic
165	CDS56075.1	50S ribosomal subunit protein L14	Amino acid transport and metabolism	Cytoplasmic
166	CDS56116.1	peptidyl-prolyl cis-trans isomerase A (rotamase A)	Energy production and conversion	Periplasmic
167	CDS56064.1	30S ribosomal subunit protein S13	Amino acid transport and metabolism	Cytoplasmic
168	CDS58396.1	DNA topoisomerase I, omega subunit	Defense mechanisms	Cytoplasmic
169	CDS58625.1	Magnesium transporter	Inorganic ion transport and metabolism	Inner membrane
170	CDS56704.1	Signal recognition particle receptor FtsY	General function prediction only	Cytoplasmic
171	CDS56063.1	30S ribosomal subunit protein S11	Amino acid transport and metabolism	Cytoplasmic
172	CDS56798.1	inorganic pyrophosphatase	Posttranslational modification, protein turnover, chaperones	Cytoplasmic
173	CDS55607.1	enolase	Translation, ribosomal structure and biogenesis	Cytoplasmic
174	CDS59023.1	conserved hypothetical protein	Posttranslational modification, protein turnover, chaperones	Extracellular
175	CDS57359.1	outer membrane protein	Transcription	Outer membrane
176	CDS57480.1	asparaginyl tRNA synthetase	Amino acid transport and metabolism	Cytoplasmic
177	CDS58550.1	stress protein, member of the CspA-family	Energy production and conversion	Cytoplasmic
178	CDS56840.1	50S ribosomal protein L28	Amino acid transport and metabolism	Cytoplasmic
179	CDS56378.1	F1 sector of membrane-bound ATP synthase, gamma subunit	Posttranslational modification, protein turnover, chaperones	Unknown
180	CDS56771.1	30S ribosomal protein S15	Amino acid transport and metabolism	Cytoplasmic
181	CDS56071.1	30S ribosomal subunit protein S8	Amino acid transport and metabolism	Cytoplasmic
182	CDS58136.1	fused glucose-specific PTS enzymes: IIBcomponent ; IIC component	Translation, ribosomal structure and biogenesis	Inner membrane
183	CDS57673.1	ATP-binding protease component	Energy production and conversion	Cytoplasmic
184	CDS55961.1	toluene tolerance efflux transporter (ABC superfamily, atp_bind)	General function prediction only	Inner membrane
185	CDS55792.1	putative peroxiredoxin	Lipid transport and metabolism	Cytoplasmic
186	CDS56458.1	cytoplasmic insertase into membrane protein, Sec system	General function prediction only	Inner membrane
187	CDS55571.1	D-alanine:D-alanine ligase	Transcription	Cytoplasmic
188	CDS56978.1	methyl-directed mismatch repair protein	Defense mechanisms	Cytoplasmic
189	CDS58522.1	flagellar protein of basal-body outer-membrane L ring	Transcription	Outer membrane
190	CDS58655.1	nucleoside diphosphate kinase (NDK) (NDP kinase) (Nucleoside-2-P kinase)	Function unknown	Cytoplasmic
191	CDS58256.1	murein lipoprotein	Transcription	Outer membrane
192	CDS58666.1	inositol monophosphatase	Translation, ribosomal structure and biogenesis	Cytoplasmic
193	CDS58768.1	DL-methionine transporter subunit ; periplasmic-binding component of ABC superfamily	Translation, ribosomal structure and biogenesis	Inner membrane
194	CDS56987.1	exoribonuclease R, RNase R	Cell wall/membrane/envelope biogenesis	Cytoplasmic
195	CDS58887.1	cytochrome o ubiquinol oxidase subunit I	Posttranslational modification, protein turnover, chaperones	Inner membrane
196	CDS56905.1	transcription termination factor	Cell wall/membrane/envelope biogenesis	Cytoplasmic
197	CDS56775.1	transcription termination/antitermination L factor	Cell wall/membrane/envelope biogenesis	Cytoplasmic
198	CDS57213.1	dihydrolipoyltranssuccinase	Posttranslational modification, protein turnover, chaperones	Cytoplasmic
199	CDS56292.1	RNA polymerase, omega subunit	Cell cycle control, cell division, chromosome partitioning	Cytoplasmic
200	CDS58366.1	diaminobutyrate--2-oxoglutarate aminotransferase (L-diaminobutyric acid transaminase) (Diaminobutyrate transaminase) (DABA aminotransferase) (DABA-AT) (L-2,4-diaminobutyrate:2-ketoglutarate 4-aminotransferase)	Posttranslational modification, protein turnover, chaperones	Cytoplasmic
201	CDS56666.1	Single-stranded DNA-binding protein	Defense mechanisms	Cytoplasmic
202	CDS56500.1	glycine tRNA synthetase, alpha subunit	Amino acid transport and metabolism	Cytoplasmic
203	CDS56069.1	50S ribosomal subunit protein L18	Amino acid transport and metabolism	Cytoplasmic
204	CDS55963.1	toluene transporter subunit: membrane component of ABC superfamily	General function prediction only	Unknown
205	CDS57397.1	conserved hypothetical protein	Posttranslational modification, protein turnover, chaperones	Cytoplasmic
206	CDS56383.1	F0 sector of membrane-bound ATP synthase, subunit a	Inorganic ion transport and metabolism	Inner membrane
207	CDS55765.1	conserved hypothetical protein	Posttranslational modification, protein turnover, chaperones	Cytoplasmic
208	CDS55827.1	peptide chain release factor 3	Amino acid transport and metabolism	Cytoplasmic
209	CDS55990.1	RNA polymerase, sigma 70 (sigma D) factor	Cell wall/membrane/envelope biogenesis	Cytoplasmic
210	CDS58647.1	GTPase involved in ribosome synthesis and maintenance	Amino acid transport and metabolism	Cytoplasmic
211	CDS58251.1	component of SufBCD complex, ATP-binding component of ABC superfamily	Inorganic ion transport and metabolism	Cytoplasmic
212	CDS56229.1	ketol-acid reductoisomerase, NAD(P)-binding	Translation, ribosomal structure and biogenesis	Cytoplasmic
213	CDS57945.1	amidophosphoribosyltransferase	Function unknown	Cytoplasmic
214	CDS55907.1	conserved hypothetical protein	Transcription	Unknown
215	CDS58258.1	pyruvate kinase I	Translation, ribosomal structure and biogenesis	Cytoplasmic
216	CDS58234.1	4-amino-4-deoxy-L-arabinose transferase	Transcription	Inner membrane
217	CDS56356.1	putative peptidase	Energy production and conversion	Cytoplasmic
218	CDS56367.1	biotin carboxylase (A subunit of acetyl-CoA carboxylase)	General function prediction only	Cytoplasmic
219	CDS58733.1	ATP-dependent RNA helicase	Defense mechanisms	Cytoplasmic
220	CDS58806.1	putative methyltransferase	Cell cycle control, cell division, chromosome partitioning	Cytoplasmic
221	CDS58322.1	hypothetical protein SYMBAF_50407	Posttranslational modification, protein turnover, chaperones	Unknown
222	CDS56077.1	50S ribosomal subunit protein L29	Carbohydrate transport and metabolism	Cytoplasmic
223	CDS58785.1	periplasmic chaperone	Energy production and conversion	Periplasmic
224	CDS56081.1	30S ribosomal protein S19	Carbohydrate transport and metabolism	Cytoplasmic
225	CDS56078.1	50S ribosomal subunit protein L16	Carbohydrate transport and metabolism	Cytoplasmic
226	CDS57942.1	bifunctional folylpolyglutamate synthase and dihydrofolate synthase	Replication, recombination and repair	Cytoplasmic
227	CDS56244.1	HU, DNA-binding transcriptional regulator, alpha subunit	Cell wall/membrane/envelope biogenesis	Cytoplasmic
228	CDS58162.1	putative GTP-binding protein	Cell cycle control, cell division, chromosome partitioning	Cytoplasmic
229	CDS55847.1	fused glycosyl transferase ; transpeptidase (Penicillin-binding protein 1B)	Replication, recombination and repair	Inner membrane
230	CDS57211.1	succinate dehydrogenase, iron-sulfur subunit	Posttranslational modification, protein turnover, chaperones	Inner membrane
231	CDS56719.1	2-octaprenylphenol hydroxylase	Replication, recombination and repair	Inner membrane
232	CDS55575.1	UDP-3-O-acyl N-acetylglucosamine deacetylase	Transcription	Cytoplasmic
233	CDS56462.1	DNA polymerase III, beta subunit	Defense mechanisms	Cytoplasmic
234	CDS57851.1	N-acetylmuramoyl-L-alanine amidase AmiD	Transcription	Cytoplasmic
235	CDS59024.1	50S ribosomal subunit protein L19	Cell cycle control, cell division, chromosome partitioning	Cytoplasmic
236	CDS57259.1	RNA helicase	Defense mechanisms	Cytoplasmic
237	CDS56155.1	two-component response regulator	Cell wall/membrane/envelope biogenesis	Cytoplasmic
238	CDS55606.1	CTP synthase	Function unknown	Cytoplasmic
239	CDS56960.1	Cpn10 chaperonin GroES, small subunit of GroESL	Energy production and conversion	Cytoplasmic
240	CDS58319.1	pyridine nucleotide transhydrogenase, alpha subunit	Posttranslational modification, protein turnover, chaperones	Inner membrane
241	CDS58906.1	SecYEG protein translocase auxillary subunit	General function prediction only	Inner membrane
242	CDS56146.1	heat shock protein Hsp33	Energy production and conversion	Cytoplasmic
243	CDS58397.1	putative inner membrane peptidase	Energy production and conversion	Inner membrane
244	CDS58953.1	putative thioredoxin domain-containing protein	Energy production and conversion	Cytoplasmic
245	CDS56327.1	DNA-binding transcriptional dual regulator	Cell wall/membrane/envelope biogenesis	Cytoplasmic
246	CDS58226.1	50S ribosomal subunit protein L20	Cell cycle control, cell division, chromosome partitioning	Cytoplasmic
247	CDS58987.1	protein disulfide isomerase II	Energy production and conversion	Periplasmic
248	CDS58128.1	3-oxoacyl-(acyl-carrier-protein) reductase	Function unknown	Cytoplasmic
249	CDS55604.1	(p)ppGpp synthetase I/GTP pyrophosphokinase	Function unknown	Cytoplasmic
250	CDS56651.1	protein HemY (protoheme IX synthesis protein)	Replication, recombination and repair	Inner membrane
251	CDS56766.1	conserved exported hypothetical protein	General function prediction only	Inner membrane
252	CDS56813.1	superoxide dismutase, Mn	Inorganic ion transport and metabolism	Probable multiple localization sites
253	CDS57660.1	putative exported protein	Transcription	Unknown
254	CDS57182.1	leucyl-tRNA synthetase	Amino acid transport and metabolism	Cytoplasmic
255	CDS56759.1	conserved hypothetical protein	Lipid transport and metabolism	Cytoplasmic
256	CDS57339.1	CDP-diacylglycerol pyrophosphatase	Function unknown	Inner membrane
257	CDS58738.1	small membrane lipoprotein	Transcription	Outer membrane
258	CDS56903.1	protein chain elongation factor EF-Tu, possible GTP-binding factor (duplicate of tufA)	Amino acid transport and metabolism	Cytoplasmic
259	CDS55723.1	DNA-binding transcriptional repressor	Cell wall/membrane/envelope biogenesis	Cytoplasmic
260	CDS59027.1	30S ribosomal subunit protein S16	Amino acid transport and metabolism	Cytoplasmic
261	CDS56074.1	50S ribosomal subunit protein L24	Amino acid transport and metabolism	Cytoplasmic
262	CDS57210.1	succinate dehydrogenase, flavoprotein subunit	Posttranslational modification, protein turnover, chaperones	Inner membrane
263	CDS56426.1	conserved hypothetical protein; putative inner membrane protein	Posttranslational modification, protein turnover, chaperones	Inner membrane
264	CDS55981.1	putative adenylate cyclase	Cell wall/membrane/envelope biogenesis	Unknown
265	CDS57713.1	fused lipid transporter subunits of ABC superfamily: membrane component ; ATP-binding component	Function unknown	Inner membrane
266	CDS56816.1	protein export chaperone	Energy production and conversion	Cytoplasmic
267	CDS56788.1	50S ribosomal subunit protein L21	Amino acid transport and metabolism	Cytoplasmic
268	CDS55523.1	30S ribosomal subunit protein S20	Amino acid transport and metabolism	Cytoplasmic
269	CDS58722.1	membrane-associated, 16S rRNA-binding GTPase	Amino acid transport and metabolism	Inner membrane
270	CDS58664.1	DNA-binding transcriptional repressor	Cell wall/membrane/envelope biogenesis	Unknown
271	CDS58269.1	putative outer membrane lipoprotein	Transcription	Outer membrane
272	CDS58209.1	ProP transporter amplifier	Energy production and conversion	Cytoplasmic
273	CDS58126.1	3-oxoacyl-(acyl-carrier-protein) synthase III	Function unknown	Cytoplasmic
274	CDS57678.1	thioredoxin reductase 1	Function unknown	Cytoplasmic
275	CDS57456.1	cell division protein involved in Z ring assembly	Translation, ribosomal structure and biogenesis	Inner membrane
276	CDS57342.1	Lipoprotein	Posttranslational modification, protein turnover, chaperones	Unknown
277	CDS56906.1	50S ribosomal subunit protein L11	Amino acid transport and metabolism	Cytoplasmic
278	CDS56818.1	putative rhodanese-related sulfurtransferase	Inorganic ion transport and metabolism	Unknown
279	CDS55927.1	putative cytochrome d ubiquinol oxidase subunit III	Lipid transport and metabolism	Inner membrane
280	CDS55685.1	hypothetical protein SYMBAF_100028	Nucleotide transport and metabolism	Unknown
281	CDS55930.1	1-acyl-sn-glycerol-3-phosphate acyltransferase	Function unknown	Inner membrane
282	CDS57964.1	NADH dehydrogenase I chain F	Posttranslational modification, protein turnover, chaperones	Cytoplasmic
283	CDS56973.1	phosphatidylserine decarboxylase	Function unknown	Inner membrane
284	CDS55620.1	4-hydroxy-L-threonine phosphate dehydrogenase,NAD-dependent	Replication, recombination and repair	Cytoplasmic
285	CDS57388.1	uridine/cytidine kinase	Function unknown	Cytoplasmic
286	CDS58798.1	2,3,4,5-tetrahydropyridine-2-carboxylate N-succinyltransferase	Translation, ribosomal structure and biogenesis	Cytoplasmic
287	CDS57954.1	acetate kinase A and propionate kinase 2	Posttranslational modification, protein turnover, chaperones	Cytoplasmic
288	CDS55882.1	aconitate hydratase 2	Posttranslational modification, protein turnover, chaperones	Cytoplasmic
289	CDS58521.1	flagellar basal body P-ring protein	Transcription	Periplasmic
290	CDS55573.1	ATP-binding cell division protein involved in recruitment of FtsK to Z ring (Cell division protein FtsA)	Translation, ribosomal structure and biogenesis	Cytoplasmic
291	CDS59003.1	D-3-phosphoglycerate dehydrogenase	Replication, recombination and repair	Cytoplasmic
292	CDS57194.1	fused N-acetyl glucosamine specific PTS enzymes: IIC component ; IIB component ; IIA component	Transcription	Inner membrane
293	CDS56974.1	ribosome small subunit-dependent GTPase A	Amino acid transport and metabolism	Cytoplasmic
294	CDS58218.1	Chelated iron transport system membrane protein YfeB	Inorganic ion transport and metabolism	Inner membrane
295	CDS57961.1	NADH dehydrogenase I chain B	Posttranslational modification, protein turnover, chaperones	Inner membrane
296	CDS56129.1	Pesticin receptor	Inorganic ion transport and metabolism	Outer membrane
297	CDS56219.1	putative site-specific recombinase; DNA invertase; Rac prophage	Function unknown	Cytoplasmic
298	CDS58779.1	DNA polymerase III alpha subunit	Defense mechanisms	Cytoplasmic
299	CDS57705.1	3-phosphoserine/phosphohydroxythreonine aminotransferase	Translation, ribosomal structure and biogenesis	Cytoplasmic
300	CDS56793.1	malate dehydrogenase, NAD(P)-binding	translation, ribosomal structure and biogenesis	Probable multiple localization sites
301	CDS57212.1	2-oxoglutarate decarboxylase, thiamin-requiring	Cell wall/membrane/envelope biogenesis	Cytoplasmic
302	CDS58504.1	putative lipoprotein	Nucleotide transport and metabolism	Unknown
303	CDS56461.1	chromosomal replication initiator protein DnaA,DNA-binding transcriptional dual regulator	Defense mechanisms	Cytoplasmic
304	CDS57941.1	acetyl-CoA carboxylase, beta (carboxyltranferase) subunit	Function unknown	Cytoplasmic
305	CDS58367.1	L-2,4-diaminobutyrate decarboxylase	Translation, ribosomal structure and biogenesis	Unknown
306	CDS55954.1	putative lipopolysaccharide transport protein B (ABC superfamily, atp_bind) (LptB)	Transcription	Cytoplasmic
307	CDS56060.1	50S ribosomal subunit protein L17	Amino acid transport and metabolism	Cytoplasmic
308	CDS56214.1	glutathione oxidoreductase	Replication, recombination and repair	Cytoplasmic
309	CDS55516.1	transaldolase B	Translation, ribosomal structure and biogenesis	Cytoplasmic
310	CDS58233.1	conserved hypothetical protein	Transcription	Cytoplasmic
311	CDS57965.1	NADH:ubiquinone oxidoreductase, chain G	Posttranslational modification, protein turnover, chaperones	Probable multiple localization sites
312	CDS55569.1	UDP-N-acetylglucosamine:N-acetylmuramyl-(pentapeptide) pyrophosphoryl-undecaprenol N-acetylglucosamine transferase	Transcription	Inner membrane
313	CDS57357.1	Fe-binding and storage protein	Inorganic ion transport and metabolism	Cytoplasmic
314	CDS55476.1	Type IV pilus biogenesis protein PilQ	Transcription	Outer membrane
315	CDS58677.1	phosphoribosylformyl-glycineamide synthetase	Function unknown	Cytoplasmic
316	CDS56736.1	Entobacterial Common Antigen (ECA) polysaccharide chain length modulation protein	Transcription	Inner membrane
317	CDS55655.1	methyl-directed mismatch repair protein	Defense mechanisms	Cytoplasmic
318	CDS57457.1	DNA ligase, NAD(+)-dependent	Defense mechanisms	Cytoplasmic
319	CDS56845.1	orotate phosphoribosyltransferase	Function unknown	Cytoplasmic
320	CDS56340.1	50S ribosomal subunit protein L31	Cell cycle control, cell division, chromosome partitioning	Cytoplasmic
321	CDS58211.1	membrane-associated Zn-dependent endopeptidase; self-cleaved (Heat shock protein htpX)	Energy production and conversion	Inner membrane
322	CDS56662.1	replicative DNA helicase	Defense mechanisms	Cytoplasmic
323	CDS57106.1	putative periplasmic pilus exported chaperone	Energy production and conversion	Periplasmic
324	CDS55969.1	topoisomerase IV subunit B	Coenzyme transport and metabolism	Cytoplasmic
325	CDS55645.1	sulfate adenylyltransferase, subunit 1	Inorganic ion transport and metabolism	Cytoplasmic
326	CDS58273.1	tyrosyl-tRNA synthetase	Amino acid transport and metabolism	Cytoplasmic
327	CDS56157.1	curved DNA-binding protein, DnaJ homologue that functions as a co-chaperone of DnaK	Energy production and conversion	Cytoplasmic
328	CDS55731.1	guanine-hypoxanthine phosphoribosyltransferase	Function unknown	Cytoplasmic
329	CDS58186.1	conserved hypothetical protein	Cell cycle control, cell division, chromosome partitioning	Cytoplasmic
330	CDS56909.1	50S ribosomal subunit protein L7/L12	Cell cycle control, cell division, chromosome partitioning	Probable multiple localization sites
331	CDS56723.1	Delta-aminolevulinic acid dehydratase	Replication, recombination and repair	Cytoplasmic
332	CDS57735.1	Outer membrane autotransporter barrel domain protein	Nucleotide transport and metabolism	Probable multiple localization sites
333	CDS55531.1	carbamoyl-phosphate synthase large subunit	Translation, ribosomal structure and biogenesis	Probable multiple localization sites
334	CDS58723.1	RNase III	Carbohydrate transport and metabolism	Cytoplasmic
335	CDS58313.1	Flagellar brake protein YcgR	Transcription	Cytoplasmic
336	CDS58828.1	phosphatidylglycerol-prolipoprotein diacylglyceryl transferase	Function unknown	Inner membrane
337	CDS56511.1	putative enzyme	Nucleotide transport and metabolism	Inner membrane
338	CDS55988.1	30S ribosomal subunit protein S21	Carbohydrate transport and metabolism	Cytoplasmic
339	CDS57856.1	putative ATP-dependent protease	Cell wall/membrane/envelope biogenesis	Cytoplasmic
340	CDS57390.1	putative inner membrane protein involved in outer membrane protein assembly	Transcription	Unknown
341	CDS58425.1	global nucleic acid-binding transcriptional dual regulator H-NS	Cell wall/membrane/envelope biogenesis	Cytoplasmic
342	CDS58429.1	glucose-1-phosphate uridylyltransferase	Translation, ribosomal structure and biogenesis	Cytoplasmic
343	CDS56072.1	30S ribosomal subunit protein S14	Carbohydrate transport and metabolism	Cytoplasmic
344	CDS57341.1	conserved exported hypothetical protein	Nucleotide transport and metabolism	Unknown
345	CDS56428.1	conserved hypothetical protein; putative outer membrane protein and surface antigen	Nucleotide transport and metabolism	Outer membrane
346	CDS56385.1	methyltransferase, SAM-dependent methyltransferase, glucose-inhibited cell-division protein	Cell wall/membrane/envelope biogenesis	Unknown
347	CDS57391.1	fused putative membrane protein ; putative membrane protein	Intracellular trafficking, secretion, and vesicular transport	Inner membrane
348	CDS58650.1	histidyl tRNA synthetase	Amino acid transport and metabolism	Cytoplasmic
349	CDS59028.1	Signal Recognition Particle (SRP) component with 4.5S RNA (ffs)	General function prediction only	Inner membrane
350	CDS55654.1	RNA polymerase, sigma S (sigma 38) factor	Cell wall/membrane/envelope biogenesis	Cytoplasmic
351	CDS56827.1	Glycosyl transferase family protein	Intracellular trafficking, secretion, and vesicular transport	Cytoplasmic
352	CDS56529.1	aspartokinase III	Translation, ribosomal structure and biogenesis	Unknown
353	CDS58142.1	respiratory NADH dehydrogenase 2/cupric reductase	Posttranslational modification, protein turnover, chaperones	Inner membrane
354	CDS56497.1	putative xylose isomerase	Translation, ribosomal structure and biogenesis	Cytoplasmic
355	CDS58138.1	purine nucleoside phosphoramidase	Function unknown	Cytoplasmic
356	CDS57484.1	dihydro-orotate oxidase, FMN-linked	Function unknown	Inner membrane
357	CDS56503.1	conserved hypothetical protein	Nucleotide transport and metabolism	Inner membrane
358	CDS56985.1	adenylosuccinate synthetase	Function unknown	Cytoplasmic
359	CDS58505.1	ATP-dependent RNA helicase, specific for 23S rRNA	Coenzyme transport and metabolism	Cytoplasmic
360	CDS57202.1	regulatory protein for replication initiation	Coenzyme transport and metabolism	Cytoplasmic
361	CDS55934.1	Membrane spanning protein in TonB-ExbB-ExbD complex	Inorganic ion transport and metabolism	Inner membrane
362	CDS55845.1	biosynthetic arginine decarboxylase, PLP-binding	Translation, ribosomal structure and biogenesis	Unknown
363	CDS55701.1	Putative serralysin C-terminal domain-containing protein (modular protein)	Nucleotide transport and metabolism	Outer membrane
364	CDS58526.1	flagellar hook assembly protein	Transcription	Extracellular
365	CDS58296.1	Salicylate synthase	Replication, recombination and repair	Cytoplasmic
366	CDS57938.1	putative semialdehyde dehydrogenase	Translation, ribosomal structure and biogenesis	Cytoplasmic
367	CDS57809.1	hypothetical protein SYMBAF_30166	Nucleotide transport and metabolism	Cytoplasmic
368	CDS57597.1	TraT complement resistance protein	Function unknown	Outer membrane
369	CDS57451.1	glucose-specific enzyme IIA component of PTS	Translation, ribosomal structure and biogenesis	Cytoplasmic
370	CDS56991.1	30S ribosomal subunit protein S18	Amino acid transport and metabolism	Cytoplasmic
371	CDS56739.1	thioredoxin 1	Function unknown	Cytoplasmic
372	CDS56065.1	preprotein translocase membrane subunit	General function prediction only	Inner membrane
373	CDS55833.1	16S RNA m2G1207 methylase	Amino acid transport and metabolism	Cytoplasmic
374	CDS59007.1	mechanosensitive channel	Transcription	Inner membrane
375	CDS58844.1	putative enzyme	Intracellular trafficking, secretion, and vesicular transport	Cytoplasmic
376	CDS58541.1	DNA-binding transcriptional dual regulator with FlhC	Cell wall/membrane/envelope biogenesis	Cytoplasmic
377	CDS58124.1	50S ribosomal subunit protein L32	Amino acid transport and metabolism	Cytoplasmic
378	CDS57491.1	conserved hypothetical protein	Transcription	Unknown
379	CDS57229.1	putative RNA binding protein	Transcription	Periplasmic
380	CDS57198.1	DNA-binding transcriptional dual regulator of siderophore biosynthesis and transport	Cell wall/membrane/envelope biogenesis	Cytoplasmic
381	CDS56964.1	Elongation factor EF-P	Amino acid transport and metabolism	Cytoplasmic
382	CDS56130.1	tryptophanyl-tRNA synthetase	Amino acid transport and metabolism	Cytoplasmic
383	CDS56097.1	FKBP-type peptidyl prolyl cis-trans isomerase (rotamase)	Energy production and conversion	Cytoplasmic
384	CDS58992.1	enzyme component involved in 2-methylthio-6-iodeadenosine formation	Coenzyme transport and metabolism	Unknown
385	CDS58229.1	integration host factor (IHF), alpha subunit,DNA-binding protein, DNA replication	Coenzyme transport and metabolism	Cytoplasmic
386	CDS58788.1	zinc metallopeptidase	Intracellular trafficking, secretion, and vesicular transport	Inner membrane
387	CDS56273.1	aminopeptidase A, a cyteinylglycinase	Energy production and conversion	Cytoplasmic
388	CDS56132.1	D-ribulose-5-phosphate 3-epimerase	Translation, ribosomal structure and biogenesis	Cytoplasmic
389	CDS55818.1	repair protein radA homolog	Coenzyme transport and metabolism	Unknown
390	CDS58360.1	conserved hypothetical protein	Nucleotide transport and metabolism	Inner membrane
391	CDS55809.1	shikimate kinase II	Translation, ribosomal structure and biogenesis	Cytoplasmic
392	CDS55979.1	fused heptose 7-phosphate kinase ; heptose 1-phosphate adenyltransferase	Translation, ribosomal structure and biogenesis	Cytoplasmic
393	CDS58473.1	putative outer membrane-associated lipoprotein	Nucleotide transport and metabolism	Outer membrane
394	CDS58880.1	proteolytic subunit of ClpA-ClpP and ClpX-ClpP ATP-dependent serine proteases	Energy production and conversion	Cytoplasmic
395	CDS58127.1	malonyl-CoA-(acyl-carrier-protein) transacylase	Function unknown	Cytoplasmic
396	CDS56076.1	30S ribosomal protein S17	Carbohydrate transport and metabolism	Cytoplasmic
397	CDS55644.1	sulfate adenylyltransferase subunit 2 (Sulfate adenylate transferase) (SAT) (ATP-sulfurylase small subunit)	Inorganic ion transport and metabolism	Cytoplasmic
398	CDS55939.1	NADPH-dependent 7-cyano-7-deazaguanine reductase	Function unknown	Cytoplasmic
399	CDS55525.1	isoleucyl-tRNA synthetase	Carbohydrate transport and metabolism	Cytoplasmic
400	CDS56821.1	ADP-L-glycero-D-mannoheptose-6-epimerase,NAD(P)-binding	Translation, ribosomal structure and biogenesis	Cytoplasmic
401	CDS58171.1	peptide chain release factor 1	Carbohydrate transport and metabolism	Cytoplasmic
402	CDS55806.1	DNA-binding protein, non-specific	Coenzyme transport and metabolism	Cytoplasmic
403	CDS58656.1	rhodanase-like enzyme, sulfur transfer from thiosulfate	Carbohydrate transport and metabolism	Cytoplasmic
404	CDS57454.1	cysteine synthase A, O-acetylserine sulfhydrolase A subunit	Translation, ribosomal structure and biogenesis	Cytoplasmic
405	CDS58372.1	hypothetical protein SYMBAF_50458	Nucleotide transport and metabolism	Unknown
406	CDS58896.1	exonuclease VII small subunit	Function unknown	Cytoplasmic
407	CDS57680.1	putative DNA-binding membrane protein required for chromosome resolution and partitioning	Coenzyme transport and metabolism	Inner membrane
408	CDS56382.1	F0 sector of membrane-bound ATP synthase, subunit c	Inorganic ion transport and metabolism	Inner membrane
409	CDS56691.1	DNA-dependent ATPase I and helicase II	Coenzyme transport and metabolism	Cytoplasmic
410	CDS57232.1	3-deoxy-D-arabino-heptulosonate-7-phosphate synthase, phenylalanine repressible	Translation, ribosomal structure and biogenesis	Cytoplasmic
411	CDS58902.1	6,7-dimethyl-8-ribityllumazine synthase (riboflavin synthase beta chain)	Replication, recombination and repair	Cytoplasmic
412	CDS58238.1	Diguanylate phosphodiesterase	Cell wall/membrane/envelope biogenesis	Cytoplasmic
413	CDS57490.1	paraquat-inducible protein B	Nucleotide transport and metabolism	Unknown
414	CDS56429.1	conserved hypothetical protein	General function prediction only	Probable multiple localization sites
415	CDS56348.1	ribonuclease E (RNase E) inhibitor protein	Coenzyme transport and metabolism	Cytoplasmic
416	CDS56326.1	pyridine nucleotide transhydrogenase, soluble	Replication, recombination and repair	Cytoplasmic
417	CDS57428.1	phosphoribosylaminoimidazole-succinocarboxamide synthase	Function unknown	Cytoplasmic
418	CDS57223.1	acyl-CoA thioesterase	Cell wall/membrane/envelope biogenesis	Unknown
419	CDS55896.1	putative cation/proton antiporter	Inorganic ion transport and metabolism	Inner membrane
420	CDS56828.1	putative lipopolysaccharide biosynthesis protein WalW	Translation, ribosomal structure and biogenesis	Cytoplasmic
421	CDS56787.1	50S ribosomal subunit protein L27	Carbohydrate transport and metabolism	Cytoplasmic
422	CDS56408.1	Ribonuclease PH	Coenzyme transport and metabolism	Cytoplasmic
423	CDS56315.1	GTP-binding protein	Translation, ribosomal structure and biogenesis	Unknown
424	CDS57502.1	queuosine biosynthesis protein	Function unknown	Cytoplasmic
425	CDS58654.1	putative Fe-S containing enzyme	Chromatin structure and dynamics	Cytoplasmic
426	CDS58224.1	Protein chain initiation factor IF-3	Carbohydrate transport and metabolism	Cytoplasmic
427	CDS57241.1	putative phosphatase	Intracellular trafficking, secretion, and vesicular transport	Unknown
428	CDS56376.1	F1 sector of membrane-bound ATP synthase, epsilon subunit	Inorganic ion transport and metabolism	Cytoplasmic
429	CDS56192.1	phosphate transporter, low-affinity	Inorganic ion transport and metabolism	Inner membrane
430	CDS58892.1	putative nucleotide binding protein (UPF0234 protein)	Intracellular trafficking, secretion, and vesicular transport	Cytoplasmic
431	CDS57483.1	aminopeptidase N	Translation, ribosomal structure and biogenesis	Cytoplasmic
432	CDS56233.1	branched-chain amino-acid aminotransferase	Translation, ribosomal structure and biogenesis	Cytoplasmic
433	CDS56612.1	conserved hypothetical protein	Nucleotide transport and metabolism	Cytoplasmic
434	CDS58643.1	exonuclease VII, large subunit	Function unknown	Cytoplasmic
435	CDS55617.1	DnaJ-like protein, membrane anchored	Energy production and conversion	Cytoplasmic
436	CDS56488.1	flavin reductase	Posttranslational modification, protein turnover, chaperones	Cytoplasmic
437	CDS55556.1	3-isopropylmalate dehydrogenase	Translation, ribosomal structure and biogenesis	Cytoplasmic
438	CDS58184.1	polyamine transporter subunit ; ATP-binding component of ABC superfamily	Translation, ribosomal structure and biogenesis	Inner membrane
439	CDS57398.1	GDP-D-mannose dehydratase, NAD(P)-binding	Function unknown	Cytoplasmic
440	CDS58146.1	ferritin iron storage protein (cytoplasmic)	Inorganic ion transport and metabolism	Cytoplasmic
441	CDS56648.1	hydroxymethylbilane synthase	Replication, recombination and repair	Cytoplasmic
442	CDS55718.1	conserved hypothetical protein	Nucleotide transport and metabolism	Unknown
443	CDS56795.1	UDP-N-acetylmuramate:L-alanyl-gamma-D-glutamyl-meso-diaminopimelate ligase	Transcription	Cytoplasmic
444	CDS55968.1	DNA topoisomerase IV, subunit A	Coenzyme transport and metabolism	Cytoplasmic
445	CDS55561.1	S-adenosyl-dependent methyltransferase activity on membrane-located substrates	Cell wall/membrane/envelope biogenesis	Cytoplasmic
446	CDS58316.1	DNA-binding transcriptional dual regulator,global regulator of anaerobic growth	Cell wall/membrane/envelope biogenesis	Cytoplasmic
447	CDS59010.1	phosphoglycerate kinase	Translation, ribosomal structure and biogenesis	Cytoplasmic
448	CDS59020.1	fused chorismate mutase P ; prephenate dehydratase	Translation, ribosomal structure and biogenesis	Cytoplasmic
449	CDS57725.1	N5-glutamine methyltransferase	Carbohydrate transport and metabolism	Cytoplasmic
450	CDS58106.1	conserved hypothetical protein	Inorganic ion transport and metabolism	Cytoplasmic
451	CDS55942.1	methylase for 50S ribosomal subunit protein L11	Carbohydrate transport and metabolism	Cytoplasmic
452	CDS58190.1	adenylosuccinate lyase	Function unknown	Cytoplasmic
453	CDS58434.1	exonuclease III	Coenzyme transport and metabolism	Cytoplasmic
454	CDS55720.1	lipoate synthase	Replication, recombination and repair	Cytoplasmic
455	CDS55900.1	adenine DNA glycosylase	Coenzyme transport and metabolism	Inner membrane
456	CDS56705.1	transporter subunit: ATP-binding component of ABC superfamily	Translation, ribosomal structure and biogenesis	Inner membrane
457	CDS56350.1	conserved hypothetical protein	Transcription	Unknown
458	CDS56080.1	50S ribosomal subunit protein L22	Carbohydrate transport and metabolism	Cytoplasmic
459	CDS58132.1	putative conserved membrane associated protein	Replication, recombination and repair	Cytoplasmic
460	CDS58477.1	glucose-6-phosphate dehydrogenase	Translation, ribosomal structure and biogenesis	Cytoplasmic
461	CDS55967.1	UDP-N-acetylglucosamine 1-carboxyvinyltransferase	Signal transduction mechanisms	Cytoplasmic
462	CDS56386.1	tRNA uridine 5-carboxymethylaminomethyl modification protein (glucose-inhibited cell-division protein)	Cell wall/membrane/envelope biogenesis	Cytoplasmic
463	CDS58272.1	pyridoxine 5'-phosphate oxidase	Replication, recombination and repair	Cytoplasmic
464	CDS56284.1	negative regulator of PhoR/PhoB two-component regulator	Inorganic ion transport and metabolism	Cytoplasmic
465	CDS57426.1	dihydrodipicolinate synthase	Translation, ribosomal structure and biogenesis	Cytoplasmic
466	CDS56716.1	recombination limiting protein	Coenzyme transport and metabolism	Unknown
467	CDS56453.1	conserved hypothetical protein; putative inner membrane protein	Intracellular trafficking, secretion, and vesicular transport	Inner membrane
468	CDS58223.1	threonyl-tRNA synthetase	Carbohydrate transport and metabolism	Cytoplasmic
469	CDS58908.1	SecYEG protein translocase auxillary subunit	General function prediction only	Inner membrane
470	CDS57718.1	3-oxoacyl-(acyl-carrier-protein) synthase I	Function unknown	Cytoplasmic
471	CDS58877.1	DNA-binding protein HU-beta	RNA processing and modification	Cytoplasmic
472	CDS58399.1	23S rRNA pseudouridylate synthase	Function unknown	Cytoplasmic
473	CDS56829.1	lipopolysaccharide core biosynthesis protein	Signal transduction mechanisms	Cytoplasmic
474	CDS57992.1	bifunctional 3-demethylubiquinone-9 3-methyltransferase and 2-octaprenyl-6-hydroxy phenol methylase	Replication, recombination and repair	Cytoplasmic
475	CDS58731.1	L-aspartate oxidase (quinolinate synthetase B)	Function unknown	Cytoplasmic
476	CDS55853.1	poly(A) polymerase I	Cell wall/membrane/envelope biogenesis	Cytoplasmic
477	CDS56734.1	UDP-N-acetyl-D-mannosaminuronic acid dehydrogenase	Translation, ribosomal structure and biogenesis	Cytoplasmic
478	CDS58544.1	DNA polymerase V, subunit D	Coenzyme transport and metabolism	Cytoplasmic
479	CDS56979.1	delta(2)-isopentenylpyrophosphate tRNA-adenosine transferase	Cell wall/membrane/envelope biogenesis	Cytoplasmic
480	CDS57445.1	thiosulfate transporter subunit ; periplasmic-binding component of ABC superfamily	Inorganic ion transport and metabolism	Periplasmic
481	CDS57644.1	homoserine transsuccinylase	Translation, ribosomal structure and biogenesis	Cytoplasmic
482	CDS57554.1	conserved hypothetical protein	Nucleotide transport and metabolism	Unknown
483	CDS56302.1	Methyltransferase domain-containing protein	Nucleotide transport and metabolism	Unknown
484	CDS56245.1	conserved hypothetical protein	Nucleotide transport and metabolism	Cytoplasmic
485	CDS55579.1	nucleoside triphosphate pyrophosphohydrolase,marked preference for dGTP	Coenzyme transport and metabolism	Cytoplasmic
486	CDS58178.1	outer membrane-specific lipoprotein transporter subunit ; ATP-binding component of ABC superfamily	Signal transduction mechanisms	Inner membrane
487	CDS59031.1	gamma-glutamate-cysteine ligase	Translation, ribosomal structure and biogenesis	Cytoplasmic
488	CDS56732.1	dTDP-glucose pyrophosphorylase (glucose-1-phosphate thymidylyltransferase)	Replication, recombination and repair	Cytoplasmic
489	CDS56325.1	DNA-binding transcriptional repressor	Cell wall/membrane/envelope biogenesis	Cytoplasmic
490	CDS56308.1	sensory histidine kinase in two-component regulatory system with GlnG	Cell wall/membrane/envelope biogenesis	Inner membrane
491	CDS59022.1	3-deoxy-D-arabino-heptulosonate-7-phosphate synthase, tyrosine-repressible	Translation, ribosomal structure and biogenesis	Cytoplasmic
492	CDS57395.1	putative ABC transporter ATP-binding protein	Nucleotide transport and metabolism	Inner membrane
493	CDS58855.1	Periplasmic solute binding protein	Inorganic ion transport and metabolism	Probable multiple localization sites
494	CDS58657.1	aminopeptidase B	Energy production and conversion	Cytoplasmic
495	CDS56701.1	zinc, cobalt and lead efflux system	Inorganic ion transport and metabolism	Inner membrane
496	CDS57186.1	putative enzyme with nucleoside triphosphate hydrolase domain	Nucleotide transport and metabolism	Cytoplasmic
497	CDS56944.1	Peptidase, S8/S53 family	Nucleotide transport and metabolism	Cytoplasmic
498	CDS58969.1	adenine phosphoribosyltransferase	Function unknown	Cytoplasmic
499	CDS58087.1	conserved hypothetical protein	Nucleotide transport and metabolism	Cytoplasmic
500	CDS57959.1	DNA-binding transcriptional repressor of flagellar, motility and chemotaxis genes	Cell wall/membrane/envelope biogenesis	Cytoplasmic
501	CDS57392.1	mannose-1-phosphate guanyltransferase	Translation, ribosomal structure and biogenesis	Cytoplasmic
502	CDS57352.1	glutamine transporter subunit ; ATP-binding component of ABC superfamily	Translation, ribosomal structure and biogenesis	Inner membrane
503	CDS56611.1	peptidase required for the maturation and secretion of the antibiotic peptide MccB17	Replication, recombination and repair	Cytoplasmic
504	CDS56442.1	putative lipoprotein 10	Nucleotide transport and metabolism	Unknown
505	CDS55958.1	D-arabinose 5-phosphate isomerase	Translation, ribosomal structure and biogenesis	Cytoplasmic
506	CDS55851.1	DNA-binding transcriptional regulator of rRNA transcription, DnaK suppressor protein	Cell wall/membrane/envelope biogenesis	Cytoplasmic
507	CDS55534.1	dihydrofolate reductase	Function unknown	Unknown
508	CDS55524.1	bifunctional riboflavin kinase and FAD synthetase	Replication, recombination and repair	Cytoplasmic
509	CDS55468.1	Pvp response regulator (Two-component response regulator bvg protein)	Cell wall/membrane/envelope biogenesis	Cytoplasmic
510	CDS59000.1	hypothetical protein SYMBAF_90242	Nucleotide transport and metabolism	Unknown
511	CDS58950.1	N5-carboxyaminoimidazole ribonucleotide mutase	Function unknown	Inner membrane
512	CDS58865.1	ammonium transporter	Inorganic ion transport and metabolism	Inner membrane
513	CDS58782.1	UDP-N-acetylglucosamine acetyltransferase	Secondary metabolites biosynthesis, transport and catabolism	Cytoplasmic
514	CDS58737.1	recombination and repair protein	Coenzyme transport and metabolism	Cytoplasmic
515	CDS58275.1	glutathionine S-transferase	Translation, ribosomal structure and biogenesis	Cytoplasmic
516	CDS58134.1	DNA polymerase III, delta prime subunit	Coenzyme transport and metabolism	Cytoplasmic
517	CDS57970.1	NADH:ubiquinone oxidoreductase, membrane subunit L	Replication, recombination and repair	Inner membrane
518	CDS57889.1	CcdB family protein	Replication, recombination and repair	Unknown
519	CDS57745.1	conserved hypothetical protein	Nucleotide transport and metabolism	Unknown
520	CDS57607.1	Type III restriction-modification system EcoPI enzyme mod	Replication, recombination and repair	Cytoplasmic
521	CDS57471.1	Involved in chromosome partioning, Ca2+ binding protein	Transcription	Cytoplasmic
522	CDS56994.1	FKBP-type peptidyl-prolyl cis-trans isomerase (rotamase)	Energy production and conversion	Cytoplasmic
523	CDS56900.1	bifunctional biotin-(acetylCoA carboxylase) holoenzyme synthetase and DNA-binding transcriptional repressor, bio-5'-AMP-binding	Cell wall/membrane/envelope biogenesis	Cytoplasmic
524	CDS56899.1	UDP-N-acetylenolpyruvoylglucosamine reductase,FAD-binding	Secondary metabolites biosynthesis, transport and catabolism	Cytoplasmic
525	CDS56843.1	deoxyuridine 5'-triphosphate nucleotidohydrolase	Function unknown	Unknown
526	CDS56694.1	ATP-dependent DNA helicase	Coenzyme transport and metabolism	Cytoplasmic
527	CDS56510.1	Pyrroline-5-carboxylate reductase	Translation, ribosomal structure and biogenesis	Inner membrane
528	CDS56237.1	conserved hypothetical protein	Nucleotide transport and metabolism	Unknown
529	CDS56136.1	shikimate kinase I	Translation, ribosomal structure and biogenesis	Cytoplasmic
530	CDS56058.1	mechanosensitive channel	Inorganic ion transport and metabolism	Inner membrane
531	CDS55653.1	outer membrane lipoprotein	Secondary metabolites biosynthesis, transport and catabolism	Outer membrane
532	CDS59074.1	transposase	Function unknown	Unknown
533	CDS58901.1	transcription antitermination protein	Cell wall/membrane/envelope biogenesis	Cytoplasmic
534	CDS58900.1	thiamin-monophosphate kinase	Replication, recombination and repair	Cytoplasmic
535	CDS58897.1	geranyltranstransferase	Cell wall/membrane/envelope biogenesis	Cytoplasmic
536	CDS58883.1	putative lipoprotein	Nucleotide transport and metabolism	Unknown
537	CDS58765.1	D,D-heptose 1,7-bisphosphate phosphatase	Translation, ribosomal structure and biogenesis	Cytoplasmic
538	CDS58734.1	uracil-DNA-glycosylase	Coenzyme transport and metabolism	Cytoplasmic
539	CDS58652.1	conserved hypothetical protein; putative HTH-type transcriptional regulator	Secondary metabolites biosynthesis, transport and catabolism	Unknown
540	CDS58595.1	conserved hypothetical protein	Nucleotide transport and metabolism	Unknown
541	CDS58439.1	cytoplasmic L-asparaginase I	Translation, ribosomal structure and biogenesis	Cytoplasmic
542	CDS58408.1	putative periplasmic protein	Nucleotide transport and metabolism	Periplasmic
543	CDS58318.1	pyridine nucleotide transhydrogenase, beta subunit	Replication, recombination and repair	Inner membrane
544	CDS58280.1	putative inner membrane oxidoreductase	Posttranslational modification, protein turnover, chaperones	Inner membrane
545	CDS58265.1	monothiol glutaredoxin	Energy production and conversion	Unknown
546	CDS57963.1	NADH:ubiquinone oxidoreductase, chain E	Posttranslational modification, protein turnover, chaperones	Cytoplasmic
547	CDS57857.1	conserved hypothetical protein	Nucleotide transport and metabolism	Cytoplasmic
548	CDS57709.1	integration host factor (IHF), DNA-binding protein, beta subunit	Coenzyme transport and metabolism	Cytoplasmic
549	CDS57668.1	conserved hypothetical protein	Nucleotide transport and metabolism	Inner membrane
550	CDS57585.1	conserved hypothetical protein	Nucleotide transport and metabolism	Cytoplasmic
551	CDS57463.1	nucleoside (except guanosine) transporter	Function unknown	Inner membrane
552	CDS57424.1	thiol peroxidase, thioredoxin-dependent	Inorganic ion transport and metabolism	Unknown
553	CDS57404.1	imidazole glycerol phosphate synthase, catalytic subunit with HisH	Translation, ribosomal structure and biogenesis	Cytoplasmic
554	CDS57373.1	molybdopterin biosynthesis protein	Replication, recombination and repair	Cytoplasmic
555	CDS57344.1	conserved hypothetical protein	Mobilome: prophages, transposons	Cytoplasmic
556	CDS57231.1	nicotinamide mononucleotide transporter	Replication, recombination and repair	Inner membrane
557	CDS57230.1	quinolinate synthetase A	Replication, recombination and repair	Cytoplasmic
558	CDS57226.1	membrane anchored protein in TolA-TolQ-TolR complex	Replication, recombination and repair	Unknown
559	CDS57215.1	succinyl-CoA synthetase alpha chain	Translation, ribosomal structure and biogenesis	Cytoplasmic
560	CDS57199.1	flavodoxin 1	Posttranslational modification, protein turnover, chaperones	Cytoplasmic
561	CDS56777.1	preprotein translocase membrane subunit	General function prediction only	Inner membrane
562	CDS56756.1	triosephosphate isomerase	Translation, ribosomal structure and biogenesis	Cytoplasmic
563	CDS56720.1	TatABCE protein translocation system subunit	General function prediction only	Inner membrane
564	CDS56614.1	Ribonuclease	Mobilome: prophages, transposons	Unknown
565	CDS56509.1	conserved hypothetical protein; putative inner membrane protein	Mobilome: prophages, transposons	Inner membrane
566	CDS56387.1	FMN-binding protein MioC	Posttranslational modification, protein turnover, chaperones	Unknown
567	CDS56285.1	phosphate transporter subunit ; ATP-binding component of ABC superfamily	Inorganic ion transport and metabolism	Inner membrane
568	CDS56165.1	Fe/S biogenesis protein	Energy production and conversion	Cytoplasmic
569	CDS56156.1	modulator of CbpA co-chaperone	Energy production and conversion	Cytoplasmic
570	CDS56134.1	conserved hypothetical protein	Mobilome: prophages, transposons	Unknown
571	CDS55749.1	D-sedoheptulose 7-phosphate isomerase	Translation, ribosomal structure and biogenesis	Cytoplasmic
572	CDS55646.1	adenosine 5'-phosphosulfate kinase	Translation, ribosomal structure and biogenesis	Cytoplasmic
573	CDS55553.1	putative malate transporter YflS	Inorganic ion transport and metabolism	Inner membrane
574	CDS55483.1	Type II secretion system protein G	General function prediction only	Inner membrane
575	CDS55450.1	isochorismate synthase 1	Inorganic ion transport and metabolism	Cytoplasmic
576	CDS56215.1	Oxidoreductase molybdopterin binding	Mobilome: prophages, transposons	Unknown
577	CDS56344.1	essential cell division protein	Transcription	Inner membrane
578	CDS55528.1	1-hydroxy-2-methyl-2-(E)-butenyl 4-diphosphate reductase, 4Fe-4S protein	Function unknown	Cytoplasmic
579	CDS56824.1	putative glycosyl transferase	Intracellular trafficking, secretion, and vesicular transport	Cytoplasmic
580	CDS58562.1	putative conserved flavoprotein	Posttranslational modification, protein turnover, chaperones	Unknown
581	CDS57555.1	Plasmid partitioning protein ParA	Coenzyme transport and metabolism	Cytoplasmic
582	CDS58176.1	transcription-repair coupling factor	Coenzyme transport and metabolism	Cytoplasmic
583	CDS58187.1	sensory histidine kinase in two-compoent regulatory system with PhoP	Cell wall/membrane/envelope biogenesis	Inner membrane
584	CDS57659.1	arginine transporter subunit ; ATP-binding component of ABC superfamily	Translation, ribosomal structure and biogenesis	Inner membrane
585	CDS55732.1	aminoacyl-histidine dipeptidase (peptidase D)	Translation, ribosomal structure and biogenesis	Cytoplasmic
586	CDS57214.1	succinyl-CoA synthetase beta chain	Translation, ribosomal structure and biogenesis	Cytoplasmic
587	CDS56697.1	putative hydrolase	Mobilome: prophages, transposons	Cytoplasmic
588	CDS58792.1	ribosome recycling factor	Carbohydrate transport and metabolism	Cytoplasmic
589	CDS55530.1	carbamoyl phosphate synthetase small subunit,glutamine amidotransferase	Translation, ribosomal structure and biogenesis	Cytoplasmic
590	CDS56486.1	proline dipeptidase	Translation, ribosomal structure and biogenesis	Cytoplasmic
591	CDS55914.1	conserved hypothetical protein; putative inner membrane protein	Secondary metabolites biosynthesis, transport and catabolism	Inner membrane
592	CDS57444.1	hypothetical protein SYMBAF_20301	Lipid transport and metabolism	Unknown
593	CDS58392.1	conserved hypothetical protein; putative inner membrane protein	Lipid transport and metabolism	Inner membrane
594	CDS57418.1	conserved membrane hypothetical protein	Lipid transport and metabolism	Inner membrane
595	CDS58635.1	fructose-bisphosphate aldolase class I	Translation, ribosomal structure and biogenesis	Cytoplasmic
596	CDS55564.1	UDP-N-acetylmuramoyl-L-alanyl-D-glutamate:meso-diaminopimelate ligase	Secondary metabolites biosynthesis, transport and catabolism	Unknown
597	CDS58898.1	1-deoxyxylulose-5-phosphate synthase,thiamine-requiring, FAD-requiring	Function unknown	Cytoplasmic
598	CDS58986.1	ssDNA exonuclease, 5'--_ 3'-specific	Coenzyme transport and metabolism	Cytoplasmic
599	CDS57695.1	ribose import ATP-binding ABC protein	Translation, ribosomal structure and biogenesis	Inner membrane
600	CDS58225.1	50S ribosomal subunit protein L35	Carbohydrate transport and metabolism	Cytoplasmic
601	CDS58642.1	IMP dehydrogenase	Function unknown	Cytoplasmic
602	CDS55823.1	phosphopentomutase	Translation, ribosomal structure and biogenesis	Cytoplasmic
603	CDS57966.1	NADH dehydrogenase I chain H	Posttranslational modification, protein turnover, chaperones	Inner membrane
604	CDS56981.1	putative GTPase	Carbohydrate transport and metabolism	Cytoplasmic
605	CDS58486.1	conserved hypothetical protein	Cell wall/membrane/envelope biogenesis	Unknown
606	CDS57207.1	citrate synthase	Translation, ribosomal structure and biogenesis	Cytoplasmic
607	CDS56357.1	conserved hypothetical protein; putative membrane protein, putative transporter	Lipid transport and metabolism	Inner membrane
608	CDS57706.1	5-enolpyruvylshikimate-3-phosphate synthetase	Translation, ribosomal structure and biogenesis	Unknown
609	CDS56717.1	bifunctional 2-octaprenyl-6-methoxy-1,4-benzoquinone methylase and S-adenosylmethionine:2-DMK methyltransferase	Replication, recombination and repair	Cytoplasmic
610	CDS57898.1	putative transposase	Lipid transport and metabolism	Cytoplasmic
611	CDS58814.1	membrane-bound lytic murein transglycosylase A	Secondary metabolites biosynthesis, transport and catabolism	Outer membrane
612	CDS58175.1	3-deoxy-D-manno-octulosonate 8-phosphate synthase	Secondary metabolites biosynthesis, transport and catabolism	Cytoplasmic
613	CDS56988.1	23S rRNA (Gm2251)-methyltransferase	Carbohydrate transport and metabolism	Cytoplasmic
614	CDS57051.1	conserved membrane hypothetical protein	Lipid transport and metabolism	Inner membrane
615	CDS56322.1	glutamate racemase	Secondary metabolites biosynthesis, transport and catabolism	Unknown
616	CDS57443.1	putative acyltransferase with acyl-CoA N-acyltransferase domain	Intracellular trafficking, secretion, and vesicular transport	Cytoplasmic
617	CDS57423.1	putative peptidase	Energy production and conversion	Inner membrane
618	CDS56067.1	50S ribosomal subunit protein L30	Carbohydrate transport and metabolism	Cytoplasmic
619	CDS56740.1	ATP-dependent RNA helicase	Cell wall/membrane/envelope biogenesis	Cytoplasmic
620	CDS58133.1	thymidylate kinase	Function unknown	Cytoplasmic
621	CDS56901.1	pantothenate kinase	Replication, recombination and repair	Cytoplasmic
622	CDS57410.1	ATP phosphoribosyltransferase	Translation, ribosomal structure and biogenesis	Cytoplasmic
623	CDS58474.1	putative peptidase	Carbohydrate transport and metabolism	Unknown
624	CDS58139.1	putative outer membrane lipoprotein	Secondary metabolites biosynthesis, transport and catabolism	Unknown
625	CDS58673.1	putative glutamine-dependent NAD(+) synthetase	Translation, ribosomal structure and biogenesis	Cytoplasmic
626	CDS58252.1	component of SufBCD complex	Energy production and conversion	Cytoplasmic
627	CDS58665.1	putative methyltransferase	Carbohydrate transport and metabolism	Cytoplasmic
628	CDS57746.1	nucleotide associated protein	Lipid transport and metabolism	Cytoplasmic
629	CDS56409.1	conserved hypothetical protein	Lipid transport and metabolism	Cytoplasmic
630	CDS55921.1	ClpXP protease specificity-enhancing factor	Lipid transport and metabolism	Cytoplasmic
631	CDS57584.1	Toxin CcdB	Replication, recombination and repair	Unknown
632	CDS55935.1	membrane spanning protein in TonB-ExbB-ExbD complex	General function prediction only	Inner membrane
633	CDS55819.1	3-phosphoserine phosphatase	Translation, ribosomal structure and biogenesis	Cytoplasmic
634	CDS58540.1	DNA-binding transcriptional dual regulator with FlhD	Cell wall/membrane/envelope biogenesis	Cytoplasmic
635	CDS58651.1	1-hydroxy-2-methyl-2-(E)-butenyl 4-diphosphate synthase	Cell wall/membrane/envelope biogenesis	Cytoplasmic
636	CDS56054.1	peptide deformylase	Carbohydrate transport and metabolism	Cytoplasmic
637	CDS57188.1	putative tRNA-i(6)A37 modification enzyme (MiaB)	Carbohydrate transport and metabolism	Cytoplasmic
638	CDS56972.1	putative mechanosensitive channel	Secondary metabolites biosynthesis, transport and catabolism	Inner membrane
639	CDS57472.1	protein involved in chromosome partitioning	Transcription	Cytoplasmic
640	CDS55529.1	dihydrodipicolinate reductase	Translation, ribosomal structure and biogenesis	Cytoplasmic
641	CDS57683.1	seryl-tRNA synthetase, also charges selenocysteinyl-tRNA with serine	Carbohydrate transport and metabolism	Cytoplasmic
642	CDS56154.1	sensory histidine kinase in two-component regulatory system with OmpR	Cell wall/membrane/envelope biogenesis	Inner membrane
643	CDS57433.1	N-succinyl-diaminopimelate deacylase	Translation, ribosomal structure and biogenesis	Cytoplasmic
644	CDS56665.1	ATPase and DNA damage recognition protein of nucleotide excision repair excinuclease UvrABC	Coenzyme transport and metabolism	Cytoplasmic
645	CDS56329.1	Argininosuccinate synthase	Translation, ribosomal structure and biogenesis	Cytoplasmic
646	CDS55951.1	sugar-specific enzyme IIA component of PTS	Translation, ribosomal structure and biogenesis	Cytoplasmic
647	CDS58909.1	queuine tRNA-ribosyltransferase (tRNA-guanine transglycosylase) (Guanine insertion enzyme)	Carbohydrate transport and metabolism	Cytoplasmic
648	CDS57354.1	glutamine transporter subunit ; periplasmic binding component of ABC superfamily	Translation, ribosomal structure and biogenesis	Periplasmic
649	CDS55822.1	purine-nucleoside phosphorylase	Function unknown	Cytoplasmic
650	CDS58479.1	pyruvate kinase II	Translation, ribosomal structure and biogenesis	Cytoplasmic
651	CDS56754.1	6-phosphofructokinase I	Translation, ribosomal structure and biogenesis	Cytoplasmic
652	CDS56728.1	TDP-Fuc4NAc:lipidIIFuc4NAc transferase	Secondary metabolites biosynthesis, transport and catabolism	Inner membrane
653	CDS56718.1	conserved hypothetical protein	Replication, recombination and repair	Unknown
654	CDS55724.1	Cold-shock DNA-binding domain protein	Cell motility	Unknown
655	CDS58783.1	(3R)-hydroxymyristol acyl carrier protein dehydratase	Function unknown	Cytoplasmic
656	CDS58776.1	modulator of Rho-dependent transcription termination	Cell motility	Cytoplasmic
657	CDS58626.1	multidrug efflux system, subunit A	Replication, recombination and repair	Inner membrane
658	CDS58523.1	flagellar component of cell-distal portion of basal-body rod	Transcription	Extracellular
659	CDS58350.1	lipid hydroperoxide peroxidase	Inorganic ion transport and metabolism	Periplasmic
660	CDS57987.1	Catalase	Inorganic ion transport and metabolism	Probable multiple localization sites
661	CDS57972.1	NADH:ubiquinone oxidoreductase, membrane subunit N	Posttranslational modification, protein turnover, chaperones	Inner membrane
662	CDS57943.1	conserved hypothetical protein	Transcription	Unknown
663	CDS56839.1	50S ribosomal subunit protein L33	Carbohydrate transport and metabolism	Cytoplasmic
664	CDS56776.1	conserved hypothetical protein	Carbohydrate transport and metabolism	Cytoplasmic
665	CDS56628.1	ketoacid-binding protein	Function unknown	Cytoplasmic
666	CDS55944.1	global DNA-binding transcriptional dual regulator	Cell motility	Cytoplasmic
667	CDS55825.1	2-deoxyribose-5-phosphate aldolase,NAD(P)-linked	Translation, ribosomal structure and biogenesis	Cytoplasmic
668	CDS58437.1	putative oxidoreductase	Lipid transport and metabolism	Unknown
669	CDS57242.1	6-phosphogluconolactonase	Translation, ribosomal structure and biogenesis	Periplasmic
670	CDS56822.1	ADP-heptose:LPS heptosyltransferase II	RNA processing and modification	Cytoplasmic
671	CDS55514.1	threonine synthase	Translation, ribosomal structure and biogenesis	Cytoplasmic
672	CDS57990.1	ribonucleoside diphosphate reductase 1, beta subunit, ferritin-like	Function unknown	Cytoplasmic
673	CDS58947.1	cysteinyl-tRNA synthetase	Carbohydrate transport and metabolism	Cytoplasmic
674	CDS56309.1	response regulator in two-component regulatory system with GlnL, nitrogen regulation (EBP family)	Cell motility	Cytoplasmic
675	CDS58145.1	DNA polymerase III, theta subunit	Coenzyme transport and metabolism	Cytoplasmic
676	CDS57382.1	NAD-linked malate dehydrogenase, Rossman fold	Translation, ribosomal structure and biogenesis	Cytoplasmic
677	CDS55856.1	pantothenate synthetase	Replication, recombination and repair	Cytoplasmic
678	CDS55463.1	Chitodextrinase (modular protein)	Translation, ribosomal structure and biogenesis	Unknown
679	CDS58494.1	putative metal-binding enzyme	Lipid transport and metabolism	Cytoplasmic
680	CDS57353.1	glutamine transporter subunit ; membrane component of ABC superfamily	Translation, ribosomal structure and biogenesis	Inner membrane
681	CDS58867.1	putative fused ATPase and permease component of metabolite ABC transporter	Intracellular trafficking, secretion, and vesicular transport	Inner membrane
682	CDS58999.1	proline aminopeptidase P II	Translation, ribosomal structure and biogenesis	Cytoplasmic
683	CDS57744.1	putative hydrolase, inner membrane-associated	Lipid transport and metabolism	Inner membrane
684	CDS58281.1	putative 4Fe-4S ferredoxin-type protein fused with unknown protein	Posttranslational modification, protein turnover, chaperones	Cytoplasmic
685	CDS57255.1	molybdopterin biosynthesis, protein C	Replication, recombination and repair	Cytoplasmic
686	CDS58336.1	putative C32 tRNA thiolase	Carbohydrate transport and metabolism	Probable multiple localization sites
687	CDS55861.1	carbonic anhydrase	Inorganic ion transport and metabolism	Cytoplasmic
688	CDS58443.1	conserved hypothetical protein	Cell wall/membrane/envelope biogenesis	Unknown
689	CDS55564.1	UDP-N-acetylmuramoyl-L-alanyl-D-glutamate:meso-diaminopimelate ligase	RNA processing and modification	Unknown
690	CDS58093.1	proline/glycine betaine transporter	Translation, ribosomal structure and biogenesis	Inner membrane
691	CDS58536.1	putative flagellar export pore protein	Transcription	Inner membrane
692	CDS55565.1	UDP-N-acetylmuramoyl-tripeptide:D-alanyl-D-alanine ligase	RNA processing and modification	Cytoplasmic
693	CDS58997.1	putative oxidoreductase with FAD/NAD(P)-binding domain	Replication, recombination and repair	Cytoplasmic
694	CDS58250.1	component of SufBCD complex	Energy production and conversion	Unknown
695	CDS57195.1	glutamyl-tRNA synthetase	Carbohydrate transport and metabolism	Cytoplasmic
696	CDS56109.1	DNA-binding transcriptional dual regulator	Cell motility	Cytoplasmic
697	CDS58964.1	Adenylate kinase	Function unknown	Cytoplasmic
698	CDS58836.1	diaminopimelate decarboxylase, PLP-binding	Translation, ribosomal structure and biogenesis	Cytoplasmic
699	CDS58454.1	DNA-binding transcriptional dual regulator of fatty acid metabolism	Function unknown	Cytoplasmic
700	CDS58134.1	DNA polymerase III, delta prime subunit	Coenzyme transport and metabolism	Cytoplasmic
701	CDS57998.1	PepSY-associated TM helix domain protein	Intracellular trafficking, secretion, and vesicular transport	Inner membrane
702	CDS57582.1	hypothetical protein SYMBAF_210038	Lipid transport and metabolism	Unknown
703	CDS57220.1	cytochrome d terminal oxidase, subunit II	Posttranslational modification, protein turnover, chaperones	Inner membrane
704	CDS56499.1	Acyl-homoserine-lactone synthase	Cell wall/membrane/envelope biogenesis	Cytoplasmic
705	CDS56277.1	DNA-binding response regulator in two-component regulatory system with CpxA	Cell motility	Cytoplasmic
706	CDS55982.1	putative signal transduction protein (SH3 domain)	Intracellular trafficking, secretion, and vesicular transport	Unknown
707	CDS55727.1	gamma-glutamylphosphate reductase	Translation, ribosomal structure and biogenesis	Cytoplasmic
708	CDS55684.1	conserved hypothetical protein	Lipid transport and metabolism	Unknown
709	CDS57406.1	imidazole glycerol phosphate synthase, glutamine amidotransferase subunit with HisF	Translation, ribosomal structure and biogenesis	Cytoplasmic
710	CDS58968.1	DNA polymerase III/DNA elongation factor III, tau and gamma subunits	Coenzyme transport and metabolism	Cytoplasmic
711	CDS58219.1	Periplasmic chelated iron-binding protein YfeA	Inorganic ion transport and metabolism	Periplasmic
712	CDS57876.1	putative AdoMet-dependent methyltransferase,UPF0064 family	Cell motility	Cytoplasmic
713	CDS56773.1	30s ribosome binding factor	Carbohydrate transport and metabolism	Cytoplasmic
714	CDS58407.1	tryptophan synthase, alpha subunit	Translation, ribosomal structure and biogenesis	Cytoplasmic
715	CDS55964.1	toluene transporter subunit: membrane component of ABC superfamily	Function unknown	Unknown
716	CDS56826.1	putative Lipid A core-O-antigen ligase-like enyme	Lipid transport and metabolism	Inner membrane
717	CDS58659.1	DnaK-like molecular chaperone specific for IscU	Energy production and conversion	Cytoplasmic
718	CDS56172.1	aspartate-semialdehyde dehydrogenase,NAD(P)-binding	Translation, ribosomal structure and biogenesis	Cytoplasmic
719	CDS58427.1	Uncharacterized 37.6 kDa protein in cld 5'region	Translation, ribosomal structure and biogenesis	Probable multiple localization sites
720	CDS58392.1	conserved hypothetical protein; putative inner membrane protein	Lipid transport and metabolism	Inner membrane
